# Supplementary material for: Cudrania tricuspidata Combined with Lacticaseibacillus rhamnosus Modulate Gut Microbiota and Alleviate Obesity-Associated Metabolic Parameters in Obese Mice
Source: MDPI journal article supplement (doi:10.3390/microorganisms9091908), 2021-09-08
Supplement: s1 [file s1]

# ***Cudrania tricuspidata* Combined with *Lactcaseibacillus rhamnosus* Modulate Gut Microbiota and Alleviate Obesity-associated Metabolic Parameters in Obese Mice**

Ju Kyoung Oh, Robie Vasquez, In-Chan Hwang, Ye Na Oh, Sang Hoon Kim, Shin Ho Kang, Jae Yeon Joung, Nam Su Oh, Sejeong Kim, Yohan Yoon, and Dae-Kyung Kang

## **Supplementary Data**

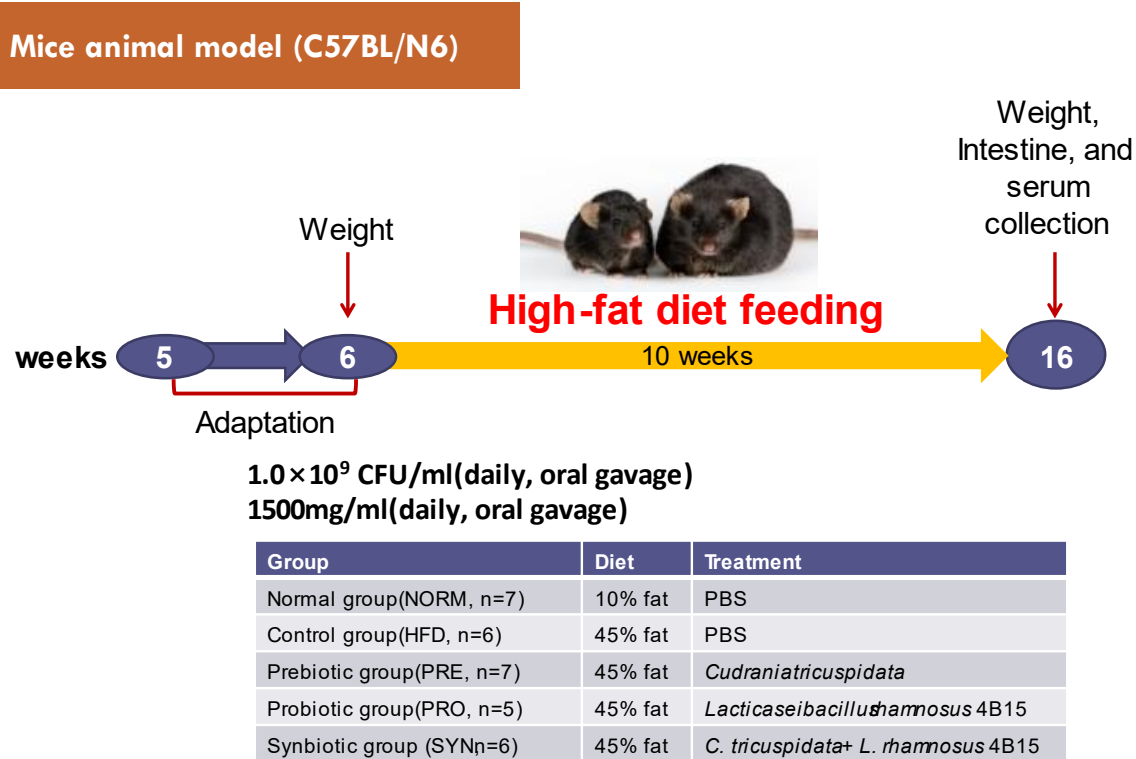

**Figure S1.** Schematic diagram showing the schedule for the feeding experiment. After a 1-week acclimation period, 31 six-week-old male C57BL/N6 mice were divided into five diet groups: normal diet (ND) group; high-fat diet (HFD) group; probiotic (PRO) group; prebiotic (PRE) group; and synbiotic (SYN) group. After 10 weeks of feeding, intestinal contents were collected and subjected to further analyses.

**Table S1.** Composition of experimental mouse diets.

| Item                                 | ND         | HFD        |
|--------------------------------------|------------|------------|
| Ingredients (g/kg)                   |            |            |
| Casein                               | 210.0      | 245.0      |
| L-Cystine                            | 3.0        | 3.5        |
| Maltodextrin                         | 50.0       | 115.0      |
| Sucrose                              | 325.0      | 200.0      |
| Lard                                 | 20.0       | 195.0      |
| Soybean oil                          | 20.0       | 30.0       |
| Cellulose                            | 37.15      | 58.0       |
| Corn starch                          | 280.0      | 85.0       |
| Mineral Mix <sup>1</sup>             | 35.0       | 43.0       |
| CaH(PO <sub>4</sub> ) <sub>2</sub>   | 2.0        | 3.4        |
| Vitamin Mix <sup>2</sup>             | 15.0       | 19.0       |
| Choline bitartrate                   | 2.75       | 3.0        |
| Food color                           | 0.1        | 0.1        |
| Chemical composition: g (w/w) (kcal) |            |            |
| Protein                              | 18.8(20.1) | 21.7(19.0) |
| Carbohydrate                         | 64.7(69.8) | 41.4(36.2) |
| Fat                                  | 4.2(10.2)  | 22.7(44.8) |
| kcal/g                               | 3.6        | 4.6        |

ND, Normal diet (TD.94048 AIN-93M Purified Diet.); HFD, High-fat diet (TD.06415 Adjusted Calories Diet (45 kcal/fat))

<sup>1</sup>Mineral mix = AIN (American Institute of Nutrition)-93G mineral mixture

<sup>2</sup>Vitamin mix = AIN-93G vitamin mixture.

**Table S2.** Weekly measurements of body weight and feed intake of experimental C57BL/N6 mice.

| Groups | Items          | Weeks      |            |            |            |            |            |            |            |            |            |            |
|--------|----------------|------------|------------|------------|------------|------------|------------|------------|------------|------------|------------|------------|
|        |                | 0          | 1          | 2          | 3          | 4          | 5          | 6          | 7          | 8          | 9          | 10         |
| ND     | Weight, g      | 20.48±0.29 | 21.06±0.37 | 22.13±0.22 | 22.99±0.19 | 23.89±0.78 | 25.31±0.69 | 25.89±0.75 | 26.44±0.77 | 26.58±0.70 | 27.51±0.77 | 25.84±0.69 |
|        | Feed intake, g |            | 75.64      | 75.80      | 69.00      | 71.20      | 80.61      | 79.16      | 77.89      | 33.04      | 40.13      | 34.01      |
| HFD    | Weight, g      | 20.81±0.32 | 21.57±0.28 | 22.53±0.49 | 23.87±0.40 | 25.31±0.49 | 26.33±0.68 | 28.14±0.72 | 29.46±0.75 | 31.23±0.87 | 31.73±0.86 | 32.14±0.92 |
|        | Feed intake, g |            | 47.50      | 53.50      | 57.61      | 57.65      | 57.64      | 63.92      | 61.28      | 62.06      | 56.99      | 62.51      |
| PRE    | Weight, g      | 20.95±0.35 | 22.07±0.44 | 23.31±0.58 | 24.86±0.70 | 26.12±0.74 | 26.55±0.79 | 27.89±0.95 | 29.08±0.99 | 29.58±0.84 | 29.81±0.74 | 30.75±0.79 |
|        | Feed intake, g |            | 56.69      | 67.83      | 72.15      | 72.38      | 68.56      | 74.95      | 73.01      | 73.34      | 60.18      | 64.56      |
| PRO    | Weight, g      | 20.43±0.43 | 21.71±0.46 | 22.42±0.45 | 22.29±0.48 | 24.19±0.38 | 25.45±0.28 | 26.50±0.58 | 27.82±0.65 | 29.06±0.57 | 30.57±0.48 | 31.69±0.46 |
|        | Feed intake, g |            | 72.16      | 65.14      | 65.57      | 81.77      | 76.62      | 70.15      | 74.17      | 70.21      | 69.32      | 68.60      |
| SYN    | Weight, g      | 20.50±0.52 | 22.28±0.59 | 22.74±0.38 | 23.95±0.57 | 25.16±0.79 | 25.92±0.79 | 27.01±1.46 | 27.69±1.08 | 28.66±1.15 | 29.96±1.30 | 30.37±1.48 |
|        | Feed intake, g |            | 68.47      | 66.91      | 65.34      | 69.73      | 70.00      | 74.30      | 73.59      | 79.13      | 71.38      | 73.57      |

Body weight values were expressed as mean ± Standard Error of Mean (SEM).

Abbreviations: ND, normal diet; HFD, high-fat diet; PRO, high-fat diet + *L. rhamnosus* 4B15; PRE, high-fat diet + *C. tricuspidata*; SYN, high-fat diet + *L. rhamnosus* 4B15 + *C. tricuspidata*.

**Table S3.** Comparison of alpha-diversity indices of the gut microbiota of C57BL/N6 mice.

| Items          | Groups <sup>1</sup> |            |           |           |           | <i>P</i> -value <sup>2</sup> |
|----------------|---------------------|------------|-----------|-----------|-----------|------------------------------|
|                | ND                  | HFD        | PRE       | PRO       | SYN       |                              |
| ACE            | 5261±969            | 5209±427   | 5933±584  | 4410±302  | 3989±559  | 0.25                         |
| Chao1          | 4810±899            | 4652±403   | 5453±538  | 4032±255  | 3633±502  | 0.13                         |
| Shannon-Weaver | 6.08±0.24           | 5.77±0.18  | 6.10±0.32 | 5.82±0.32 | 6.62±0.34 | 0.30                         |
| Simpson        | 0.91±0.01           | 0.900±0.01 | 0.91±0.01 | 0.90±0.02 | 0.94±0.01 | 0.10                         |

<sup>1</sup>Values were expressed as mean ± Standard Error of Mean.

<sup>2</sup>*P*-values for were calculated using one-way ANOVA.

Abbreviations: ND, normal diet; HFD, high-fat diet; PRO, high-fat diet + *L. rhamnosus* 4B15; PRE, high-fat diet + *C. tricuspidata*; SYN, high-fat diet + *L. rhamnosus* 4B15 + *C. tricuspidata*.

**Table S4.** Relative abundance of taxonomic groups at phylum level (cut-off > 0.1).

| Phyla           | Relative Abundance, % |       |       |       |       |
|-----------------|-----------------------|-------|-------|-------|-------|
|                 | ND                    | HFD   | PRE   | PRO   | SYN   |
| Firmicutes      | 39.40                 | 42.15 | 58.04 | 48.21 | 59.37 |
| Bacteroidetes   | 32.94                 | 17.17 | 31.86 | 33.03 | 13.24 |
| F/B ratio       | 2.42                  | 2.72  | 1.92  | 1.81  | 4.40  |
| Proteobacteria  | 13.63                 | 22.66 | 4.61  | 10.35 | 13.67 |
| Verrucomicrobia | 10.66                 | 15.25 | 1.88  | 5.34  | 9.83  |
| Deferribacteres | 0.44                  | 0.29  | 0.79  | 0.01  | 0.42  |
| Actinobacteria  | 0.11                  | 0.10  | 0.19  | 0.51  | 0.88  |
| TM7             | 0.14                  | 0.15  | 0.04  | 0.004 | 0.39  |
| Other Phyla     | 2.69                  | 2.23  | 2.59  | 2.56  | 2.20  |

Values were expressed as mean.

Abbreviations: ND, normal diet; HFD, high-fat diet; PRO, high-fat diet + *L. rhamnosus* 4B15; PRE, high-fat diet + *C. tricuspidata*; SYN, high-fat diet + *L. rhamnosus* 4B15 + *C. tricuspidata*

**Table S5.** Relative abundance of taxonomic groups at genus level (cut-off > 0.1).

| Genus                                    | Relative Abundance, % |       |       |       |       |
|------------------------------------------|-----------------------|-------|-------|-------|-------|
|                                          | ND                    | HFD   | PRE   | PRO   | SYN   |
| unclassified Clostridiales               | 21.91                 | 28.76 | 43.34 | 29.23 | 36.80 |
| <i>Bacteroides</i>                       | 23.20                 | 10.97 | 26.49 | 24.68 | 9.73  |
| <i>Akkermansia</i>                       | 10.66                 | 15.25 | 1.88  | 5.33  | 9.82  |
| <i>Helicobacter</i>                      | 8.99                  | 19.97 | 0.00  | 0.04  | 0.00  |
| unclassified S24-7                       | 5.27                  | 4.18  | 4.48  | 7.50  | 3.31  |
| <i>Desulfovibrio</i>                     | 1.47                  | 0.83  | 3.38  | 6.32  | 12.43 |
| [ <i>Ruminococcus</i> ]                  | 3.73                  | 2.89  | 1.27  | 7.66  | 4.78  |
| unclassified Ruminococcaceae             | 3.19                  | 2.86  | 3.25  | 1.77  | 3.02  |
| <i>Oscillospira</i>                      | 3.38                  | 2.06  | 3.82  | 2.06  | 2.35  |
| unclassified Lachnospiraceae             | 1.95                  | 2.19  | 2.09  | 3.86  | 3.11  |
| unclassified Desulfovibrionaceae (other) | 2.79                  | 0.92  | 1.16  | 0.79  | 1.11  |
| [ <i>Prevotella</i> ]                    | 3.73                  | 0.59  | 0.00  | 0.02  | 0.01  |
| <i>Allobaculum</i>                       | 1.00                  | 0.03  | 1.63  | 0.00  | 1.61  |
| <i>Dorea</i>                             | 0.20                  | 0.39  | 0.61  | 0.82  | 2.19  |
| unclassified Helicobacteraceae           | 0.00                  | 0.01  | 0.00  | 2.96  | 0.00  |
| <i>Parabacteroides</i>                   | 0.50                  | 0.19  | 0.75  | 0.62  | 0.13  |
| <i>Mucispirillum</i>                     | 0.44                  | 0.29  | 0.79  | 0.01  | 0.42  |
| <i>Coprococcus</i>                       | 0.30                  | 0.33  | 0.40  | 0.36  | 0.71  |
| unclassified Clostridiaceae (other)      | 0.41                  | 0.00  | 0.00  | 0.01  | 1.46  |
| unclassified Lachnospiraceae             | 0.25                  | 0.43  | 0.35  | 0.39  | 0.46  |
| <i>Lactobacillus</i>                     | 0.12                  | 0.24  | 0.12  | 0.51  | 0.80  |
| <i>Ruminococcus</i>                      | 0.45                  | 0.34  | 0.34  | 0.16  | 0.15  |
| unclassified Clostridiaceae              | 0.84                  | 0.07  | 0.04  | 0.11  | 0.29  |
| <i>Adlercreutzia</i>                     | 0.09                  | 0.08  | 0.14  | 0.33  | 0.70  |
| unclassified Erysipelotrichaceae         | 0.15                  | 0.75  | 0.02  | 0.38  | 0.04  |
| unclassified Christensenellaceae         | 0.08                  | 0.08  | 0.08  | 0.06  | 0.34  |
| <i>Flexispira</i>                        | 0.14                  | 0.48  | 0.00  | 0.00  | 0.00  |
| <i>Lactococcus</i>                       | 0.00                  | 0.03  | 0.07  | 0.14  | 0.15  |
| unclassified Desulfovibrionaceae         | 0.00                  | 0.29  | 0.00  | 0.02  | 0.01  |
| <i>Odoribacter</i>                       | 0.03                  | 0.17  | 0.02  | 0.06  | 0.03  |
| <i>Bifidobacterium</i>                   | 0.00                  | 0.01  | 0.04  | 0.02  | 0.09  |
| Other Genera                             | 4.70                  | 4.33  | 3.44  | 3.80  | 3.96  |

Values were expressed as mean.

Abbreviations: ND, normal diet; HFD, high-fat diet; PRO, high-fat diet + *L. rhamnosus* 4B15; PRE, high-fat diet + *C. tricuspidata*; SYN, high-fat diet + *L. rhamnosus* 4B15 + *C. tricuspidata*

**Table S6.** Relative abundance of predicted KEGG pathways in mice gut microbiota (cut-off > 0.1).

| KEGG Pathways                        |                                      |                                             | Relative Abundance, % |      |
|--------------------------------------|--------------------------------------|---------------------------------------------|-----------------------|------|
| Level 1                              | Level 2                              | Level 3                                     | HFD                   | SYN  |
| Environmental Information Processing | Membrane Transport                   | Transporters                                | 7.02                  | 8.32 |
| Environmental Information Processing | Membrane Transport                   | ABC transporters                            | 3.22                  | 3.81 |
| Genetic Information Processing       | Replication and Repair               | DNA repair and recombination proteins       | 2.50                  | 2.55 |
| Metabolism                           | Nucleotide Metabolism                | Purine metabolism                           | 2.06                  | 2.05 |
| Environmental Information Processing | Signal Transduction                  | Two-component system                        | 2.04                  | 2.03 |
| Genetic Information Processing       | Translation                          | Ribosome                                    | 2.08                  | 1.95 |
| Genetic Information Processing       | Transcription                        | Transcription factors                       | 1.55                  | 1.89 |
| Metabolism                           | Enzyme Families                      | Peptidases                                  | 1.72                  | 1.77 |
| Metabolism                           | Nucleotide Metabolism                | Pyrimidine metabolism                       | 1.61                  | 1.65 |
| Cellular Processes                   | Cell Motility                        | Bacterial motility proteins                 | 1.76                  | 1.51 |
| Metabolism                           | Carbohydrate Metabolism              | Amino sugar and nucleotide sugar metabolism | 1.39                  | 1.44 |
| Genetic Information Processing       | Replication and Repair               | Chromosome                                  | 1.35                  | 1.37 |
| Metabolism                           | Amino Acid Metabolism                | Amino acid related enzymes                  | 1.43                  | 1.36 |
| Metabolism                           | Energy Metabolism                    | Methane metabolism                          | 1.21                  | 1.30 |
| Environmental Information Processing | Membrane Transport                   | Secretion system                            | 1.56                  | 1.28 |
| Metabolism                           | Amino Acid Metabolism                | Arginine and proline metabolism             | 1.34                  | 1.25 |
| Other                                | Cellular Processes and Signaling     | Other ion-coupled transporters              | 1.18                  | 1.21 |
| Genetic Information Processing       | Translation                          | Ribosome Biogenesis                         | 1.18                  | 1.19 |
| Genetic Information Processing       | Replication and Repair               | DNA replication proteins                    | 1.05                  | 1.09 |
| Genetic Information Processing       | Translation                          | Aminoacyl-tRNA biosynthesis                 | 1.17                  | 1.08 |
| Metabolism                           | Carbohydrate Metabolism              | Glycolysis / Gluconeogenesis                | 0.99                  | 1.07 |
| Metabolism                           | Metabolism of Cofactors and Vitamins | Porphyrin and chlorophyll metabolism        | 0.85                  | 1.04 |
| Metabolism                           | Energy Metabolism                    | Oxidative phosphorylation                   | 1.28                  | 1.02 |
| Metabolism                           | Carbohydrate Metabolism              | Pyruvate metabolism                         | 1.04                  | 0.99 |
| Metabolism                           | Amino Acid Metabolism                | Alanine, aspartate and glutamate metabolism | 0.99                  | 0.99 |

|                                      |                                    |                                                     |      |      |
|--------------------------------------|------------------------------------|-----------------------------------------------------|------|------|
| Genetic Information Processing       | Transcription                      | Transcription machinery                             | 0.99 | 0.96 |
| Metabolism                           | Carbohydrate Metabolism            | Fructose and mannose metabolism                     | 0.82 | 0.94 |
| Metabolism                           | Carbohydrate Metabolism            | Pentose phosphate pathway                           | 0.83 | 0.92 |
| Metabolism                           | Carbohydrate Metabolism            | Starch and sucrose metabolism                       | 0.79 | 0.91 |
| Genetic Information Processing       | Folding, Sorting and Degradation   | Chaperones and folding catalysts                    | 0.99 | 0.90 |
| Metabolism                           | Energy Metabolism                  | Carbon fixation pathways in prokaryotes             | 1.02 | 0.87 |
| Metabolism                           | Amino Acid Metabolism              | Cysteine and methionine metabolism                  | 0.82 | 0.85 |
| Other                                | Metabolism                         | Energy metabolism                                   | 0.78 | 0.84 |
| Other                                | Genetic Information Processing     | Translation proteins                                | 0.84 | 0.84 |
| Metabolism                           | Amino Acid Metabolism              | Glycine, serine and threonine metabolism            | 0.79 | 0.81 |
| Metabolism                           | Carbohydrate Metabolism            | Galactose metabolism                                | 0.68 | 0.81 |
| Other                                | Genetic Information Processing     | Protein folding and associated processing           | 0.89 | 0.79 |
| Genetic Information Processing       | Replication and Repair             | Homologous recombination                            | 0.78 | 0.78 |
| Metabolism                           | Amino Acid Metabolism              | Lysine biosynthesis                                 | 0.77 | 0.77 |
| Metabolism                           | Amino Acid Metabolism              | Phenylalanine, tyrosine and tryptophan biosynthesis | 0.82 | 0.77 |
| Other                                | Genetic Information Processing     | Replication, recombination and repair proteins      | 0.75 | 0.76 |
| Cellular Processes                   | Cell Motility                      | Bacterial chemotaxis                                | 0.77 | 0.74 |
| Other                                | Cellular Processes and Signaling   | Sporulation                                         | 0.51 | 0.74 |
| Genetic Information Processing       | Replication and Repair             | Mismatch repair                                     | 0.73 | 0.73 |
| Cellular Processes                   | Cell Motility                      | Flagellar assembly                                  | 0.92 | 0.73 |
| Metabolism                           | Amino Acid Metabolism              | Valine, leucine and isoleucine biosynthesis         | 0.79 | 0.72 |
| Metabolism                           | Glycan Biosynthesis and Metabolism | Peptidoglycan biosynthesis                          | 0.69 | 0.71 |
| Metabolism                           | Energy Metabolism                  | Nitrogen metabolism                                 | 0.65 | 0.69 |
| Metabolism                           | Carbohydrate Metabolism            | Pentose and glucuronate interconversions            | 0.56 | 0.66 |
| Metabolism                           | Carbohydrate Metabolism            | Butanoate metabolism                                | 0.60 | 0.61 |
| Metabolism                           | Energy Metabolism                  | Carbon fixation in photosynthetic organisms         | 0.60 | 0.60 |
| Environmental Information Processing | Membrane Transport                 | Bacterial secretion system                          | 0.74 | 0.59 |



|                                      |                                          |                                                 |      |      |
|--------------------------------------|------------------------------------------|-------------------------------------------------|------|------|
| Genetic Information Processing       | Replication and Repair                   | DNA replication                                 | 0.59 | 0.59 |
| Metabolism                           | Metabolism of Cofactors and Vitamins     | One carbon pool by folate                       | 0.56 | 0.57 |
| Metabolism                           | Carbohydrate Metabolism                  | Glyoxylate and dicarboxylate metabolism         | 0.58 | 0.56 |
| Metabolism                           | Metabolism of Cofactors and Vitamins     | Pantothenate and CoA biosynthesis               | 0.61 | 0.55 |
| Metabolism                           | Lipid Metabolism                         | Lipid biosynthesis proteins                     | 0.58 | 0.54 |
| Metabolism                           | Lipid Metabolism                         | Glycerophospholipid metabolism                  | 0.59 | 0.53 |
| Metabolism                           | Amino Acid Metabolism                    | Histidine metabolism                            | 0.57 | 0.53 |
| Metabolism                           | Carbohydrate Metabolism                  | Citrate cycle (TCA cycle)                       | 0.66 | 0.53 |
| Genetic Information Processing       | Folding, Sorting and Degradation         | Protein export                                  | 0.57 | 0.52 |
| Metabolism                           | Lipid Metabolism                         | Glycerolipid metabolism                         | 0.43 | 0.51 |
| Metabolism                           | Carbohydrate Metabolism                  | Propanoate metabolism                           | 0.54 | 0.47 |
| Cellular Processes                   | Cell Growth and Death                    | Cell cycle - Caulobacter                        | 0.46 | 0.47 |
| Metabolism                           | Metabolism of Terpenoids and Polyketides | Terpenoid backbone biosynthesis                 | 0.48 | 0.46 |
| Other                                | Cellular Processes and Signaling         | Membrane and intracellular structural molecules | 0.61 | 0.46 |
| Genetic Information Processing       | Translation                              | Translation factors                             | 0.48 | 0.46 |
| Metabolism                           | Metabolism of Cofactors and Vitamins     | Thiamine metabolism                             | 0.42 | 0.45 |
| Genetic Information Processing       | Folding, Sorting and Degradation         | RNA degradation                                 | 0.47 | 0.44 |
| Other                                | Cellular Processes and Signaling         | Signal transduction mechanisms                  | 0.42 | 0.43 |
| Metabolism                           | Glycan Biosynthesis and Metabolism       | Other glycan degradation                        | 0.42 | 0.43 |
| Metabolism                           | Lipid Metabolism                         | Fatty acid biosynthesis                         | 0.49 | 0.42 |
| Genetic Information Processing       | Replication and Repair                   | Base excision repair                            | 0.42 | 0.41 |
| Environmental Information Processing | Membrane Transport                       | Phosphotransferase system (PTS)                 | 0.21 | 0.41 |
| Metabolism                           | Enzyme Families                          | Protein kinases                                 | 0.37 | 0.38 |
| Genetic Information Processing       | Replication and Repair                   | Nucleotide excision repair                      | 0.39 | 0.37 |
| Metabolism                           | Metabolism of Other Amino Acids          | Selenocompound metabolism                       | 0.36 | 0.35 |
| Metabolism                           | Glycan Biosynthesis and Metabolism       | Lipopolysaccharide biosynthesis proteins        | 0.60 | 0.34 |
| Metabolism                           | Metabolism of Cofactors and Vitamins     | Nicotinate and nicotinamide metabolism          | 0.30 | 0.34 |

|                                |                                             |                                            |      |      |
|--------------------------------|---------------------------------------------|--------------------------------------------|------|------|
| Metabolism                     | Energy Metabolism                           | Photosynthesis proteins                    | 0.36 | 0.33 |
| Cellular Processes             | Cell Motility                               | Cytoskeleton proteins                      | 0.31 | 0.33 |
| Metabolism                     | Lipid Metabolism                            | Sphingolipid metabolism                    | 0.31 | 0.33 |
| Metabolism                     | Biosynthesis of Other Secondary Metabolites | Streptomycin biosynthesis                  | 0.32 | 0.32 |
| Metabolism                     | Energy Metabolism                           | Photosynthesis                             | 0.35 | 0.32 |
| Metabolism                     | Metabolism of Cofactors and Vitamins        | Folate biosynthesis                        | 0.42 | 0.31 |
| Metabolism                     | Carbohydrate Metabolism                     | C5-Branched dibasic acid metabolism        | 0.32 | 0.31 |
| Metabolism                     | Amino Acid Metabolism                       | Tyrosine metabolism                        | 0.28 | 0.30 |
| Metabolism                     | Xenobiotics Biodegradation and Metabolism   | Drug metabolism - other enzymes            | 0.27 | 0.30 |
| Metabolism                     | Glycan Biosynthesis and Metabolism          | Glycosyltransferases                       | 0.34 | 0.30 |
| Other                          | Cellular Processes and Signaling            | Inorganic ion transport and metabolism     | 0.33 | 0.28 |
| Metabolism                     | Energy Metabolism                           | Sulfur metabolism                          | 0.32 | 0.27 |
| Other                          | Cellular Processes and Signaling            | Pores ion channels                         | 0.36 | 0.27 |
| Metabolism                     | Metabolism of Other Amino Acids             | Cyanoamino acid metabolism                 | 0.26 | 0.27 |
| Metabolism                     | Metabolism of Terpenoids and Polyketides    | Prenyltransferases                         | 0.29 | 0.26 |
| Genetic Information Processing | Folding, Sorting and Degradation            | Sulfur relay system                        | 0.30 | 0.25 |
| Other                          | Metabolism                                  | Amino acid metabolism                      | 0.19 | 0.23 |
| Metabolism                     | Amino Acid Metabolism                       | Valine, leucine and isoleucine degradation | 0.20 | 0.23 |
| Other                          | Metabolism                                  | Carbohydrate metabolism                    | 0.18 | 0.22 |
| Metabolism                     | Glycan Biosynthesis and Metabolism          | Lipopolysaccharide biosynthesis            | 0.46 | 0.22 |
| Other                          | Cellular Processes and Signaling            | Cell motility and secretion                | 0.31 | 0.22 |
| Metabolism                     | Lipid Metabolism                            | Fatty acid metabolism                      | 0.19 | 0.21 |
| Metabolism                     | Amino Acid Metabolism                       | Phenylalanine metabolism                   | 0.19 | 0.21 |
| Cellular Processes             | Transport and Catabolism                    | Lysosome                                   | 0.23 | 0.20 |
| Metabolism                     | Xenobiotics Biodegradation and Metabolism   | Chloroalkane and chloroalkene degradation  | 0.17 | 0.20 |

|                                      |                                             |                                                     |      |      |
|--------------------------------------|---------------------------------------------|-----------------------------------------------------|------|------|
| Metabolism                           | Metabolism of Terpenoids and Polyketides    | Polyketide sugar unit biosynthesis                  | 0.19 | 0.20 |
| Metabolism                           | Metabolism of Cofactors and Vitamins        | Ubiquinone and other terpenoid-quinone biosynthesis | 0.24 | 0.19 |
| Metabolism                           | Xenobiotics Biodegradation and Metabolism   | Benzoate degradation                                | 0.18 | 0.19 |
| Organismal Systems                   | Environmental Adaptation                    | Plant-pathogen interaction                          | 0.18 | 0.17 |
| Metabolism                           | Carbohydrate Metabolism                     | Ascorbate and aldarate metabolism                   | 0.14 | 0.17 |
| Metabolism                           | Metabolism of Other Amino Acids             | Glutathione metabolism                              | 0.22 | 0.17 |
| Metabolism                           | Metabolism of Cofactors and Vitamins        | Riboflavin metabolism                               | 0.24 | 0.17 |
| Metabolism                           | Metabolism of Cofactors and Vitamins        | Vitamin B6 metabolism                               | 0.17 | 0.17 |
| Cellular Processes                   | Transport and Catabolism                    | Peroxisome                                          | 0.16 | 0.17 |
| Metabolism                           | Xenobiotics Biodegradation and Metabolism   | Naphthalene degradation                             | 0.14 | 0.16 |
| Metabolism                           | Amino Acid Metabolism                       | Tryptophan metabolism                               | 0.18 | 0.16 |
| Genetic Information Processing       | Translation                                 | RNA transport                                       | 0.11 | 0.15 |
| Metabolism                           | Carbohydrate Metabolism                     | Inositol phosphate metabolism                       | 0.15 | 0.15 |
| Metabolism                           | Biosynthesis of Other Secondary Metabolites | Phenylpropanoid biosynthesis                        | 0.13 | 0.15 |
| Metabolism                           | Glycan Biosynthesis and Metabolism          | Glycosphingolipid biosynthesis - globo series       | 0.15 | 0.14 |
| Genetic Information Processing       | Transcription                               | RNA polymerase                                      | 0.14 | 0.14 |
| Metabolism                           | Lipid Metabolism                            | Biosynthesis of unsaturated fatty acids             | 0.19 | 0.14 |
| Metabolism                           | Metabolism of Other Amino Acids             | beta-Alanine metabolism                             | 0.16 | 0.14 |
| Human Diseases                       | Infectious Diseases                         | Tuberculosis                                        | 0.14 | 0.14 |
| Metabolism                           | Xenobiotics Biodegradation and Metabolism   | Aminobenzoate degradation                           | 0.15 | 0.14 |
| Other                                | Metabolism                                  | Lipid metabolism                                    | 0.14 | 0.13 |
| Metabolism                           | Metabolism of Cofactors and Vitamins        | Biotin metabolism                                   | 0.18 | 0.13 |
| Environmental Information Processing | Signaling Molecules and Interaction         | Bacterial toxins                                    | 0.15 | 0.13 |
| Metabolism                           | Metabolism of Terpenoids and Polyketides    | Biosynthesis of ansamycins                          | 0.11 | 0.13 |

|                                      |                                    |                                                            |      |      |
|--------------------------------------|------------------------------------|------------------------------------------------------------|------|------|
| Metabolism                           | Amino Acid Metabolism              | Lysine degradation                                         | 0.15 | 0.12 |
|                                      | Biosynthesis of Other Secondary    |                                                            |      |      |
| Metabolism                           | Metabolites                        | Novobiocin biosynthesis                                    | 0.12 | 0.12 |
| Metabolism                           | Metabolism of Other Amino Acids    | D-Glutamine and D-glutamate metabolism                     | 0.13 | 0.12 |
| Metabolism                           | Metabolism of Other Amino Acids    | Taurine and hypotaurine metabolism                         | 0.14 | 0.12 |
| Other                                | Metabolism                         | Metabolism of cofactors and vitamins                       | 0.13 | 0.11 |
|                                      | Metabolism of Terpenoids and       |                                                            |      |      |
| Metabolism                           | Polyketides                        | Tetracycline biosynthesis                                  | 0.14 | 0.10 |
|                                      | Metabolism of Terpenoids and       |                                                            |      |      |
| Metabolism                           | Polyketides                        | Limonene and pinene degradation                            | 0.11 | 0.10 |
| Metabolism                           | Metabolism of Other Amino Acids    | D-Alanine metabolism                                       | 0.11 | 0.10 |
|                                      | Biosynthesis of Other Secondary    |                                                            |      |      |
| Metabolism                           | Metabolites                        | Tropane, piperidine and pyridine alkaloid biosynthesis     | 0.10 | 0.10 |
| Organismal Systems                   | Nervous System                     | Glutamatergic synapse                                      | 0.09 | 0.10 |
| Metabolism                           | Glycan Biosynthesis and Metabolism | Glycosaminoglycan degradation                              | 0.13 | 0.10 |
| Other                                | Genetic Information Processing     | Restriction enzyme                                         | 0.15 | 0.09 |
| Environmental Information Processing | Signal Transduction                | Phosphatidylinositol signaling system                      | 0.11 | 0.09 |
|                                      |                                    | Epithelial cell signaling in Helicobacter pylori infection |      |      |
| Human Diseases                       | Infectious Diseases                |                                                            | 0.11 | 0.08 |
| Other                                | Other                              | Other                                                      | 9.40 | 9.35 |

Abbreviations: KEGG, Kyoto Encyclopedia of Genes and Genomes; HFD, high-fat diet; SYN, high-fat diet + *L. rhamnosus* 4B15 + *C. tricuspidata*.
